# Supplementary material for: Polytrauma Is Associated with Increased Three- and Six-Month Disability after Traumatic Brain Injury: A TRACK-TBI Pilot Study
Source: PubMed Central journal article supplement (PMC8240880; doi:10.1089/neur.2020.0004), 2020-07-23

## Supplementary Data

**Supplementary Table S1. Multinomial Ordinal Regression for 3-Month and 6-Month GOSE**

| <i>Predictor</i>       | <i>3-Month GOSE</i> |               |                 | <i>6-Month GOSE</i> |               |                 |
|------------------------|---------------------|---------------|-----------------|---------------------|---------------|-----------------|
|                        | <i>Odds Ratio</i>   | <i>95% CI</i> | <i>Sig. (p)</i> | <i>Odds Ratio</i>   | <i>95% CI</i> | <i>Sig. (p)</i> |
| Cohort                 |                     |               |                 |                     |               |                 |
| Isolated TBI           | Reference           | —             | —               | Reference           | —             | —               |
| TBI+Polytrauma         | 3.05                | 1.76-5.26     | <0.001          | 2.04                | 1.18-3.42     | 0.010           |
| Age                    |                     |               |                 |                     |               |                 |
| Per-year change        | 1.02                | 1.01-1.03     | <0.001          | 1.02                | 1.01-1.03     | <0.001          |
| Sex                    |                     |               |                 |                     |               |                 |
| Male                   | Reference           | —             | —               | Reference           | —             | —               |
| Female                 | 1.14                | 0.74-1.74     | 0.561           | 1.16                | 0.76-1.78     | 0.489           |
| Race                   |                     |               |                 |                     |               |                 |
| Caucasian              | Reference           | —             | —               | Reference           | —             | —               |
| African/AA             | 2.51                | 1.24-5.08     | 0.010           | 1.27                | 0.62-2.62     | 0.510           |
| Other                  | 1.32                | 0.73-2.39     | 0.366           | 1.36                | 0.76-2.45     | 0.300           |
| Education              |                     |               |                 |                     |               |                 |
| Per-year change        | 0.93                | 0.86-0.99     | 0.024           | 0.88                | 0.82-0.95     | <0.001          |
| Psychiatric history    |                     |               |                 |                     |               |                 |
| No                     | Reference           | —             | —               | Reference           | —             | —               |
| Yes                    | 1.97                | 1.28-3.03     | 0.002           | 2.00                | 1.30-3.08     | 0.002           |
| Mechanism (high speed) |                     |               |                 |                     |               |                 |
| No                     | Reference           | —             | —               | Reference           | —             | —               |
| Yes                    | 0.75                | 0.49-1.16     | 0.201           | 0.62                | 0.40-0.95     | 0.029           |
| Initial GCS            |                     |               |                 |                     |               |                 |
| 13-15                  | Reference           | —             | —               | Reference           | —             | —               |
| 3-12                   | 3.96                | 2.16-7.25     | <0.001          | 3.53                | 1.97-6.36     | <0.001          |
| Marshall CT score      |                     |               |                 |                     |               |                 |
| 1                      | Reference           | —             | —               | Reference           | —             | —               |
| 2                      | 1.94                | 1.23-3.06     | 0.005           | 0.94                | 0.59-1.48     | 0.780           |
| 3-4                    | 5.65                | 2.64-12.08    | <0.001          | 3.00                | 1.40-6.39     | 0.005           |
| 5-6                    | 14.74               | 5.52-39.37    | <0.001          | 6.92                | 2.66-18.00    | <0.001          |

Multi-variable ordinal regression for TBI+Polytrauma versus Isolated TBI with odds ratios and significance values displayed for variables in the model for worse ordinal outcome on GOSE. Variables are known predictors for TBI outcome. After controlling for covariates, TBI+Polytrauma was associated with increased odds ratios for poorer ordinal outcome on 3- and 6-month GOSE.

AA, African-American; CI, confidence interval; CT, computed tomography; GCS, Glasgow Coma Scale; GOSE, Glasgow Outcome Scale-Extended; TBI, traumatic brain injury.

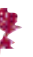

Supplement: Supp_Table1.pdf [file Supp_Table1.pdf]
